# Supplementary figures and images for: Cuprate superconducting materials above liquid nitrogen temperature from machine learning
Source: Royal Society of Chemistry journal article supplement (doi:10.1039/d3ra02848h), 2023-01-01

**a**

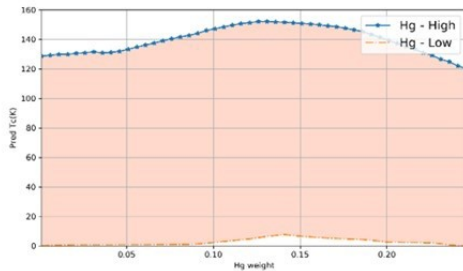

**b**

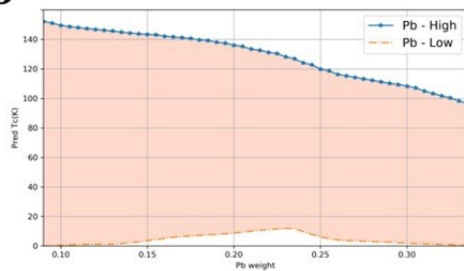

**c**

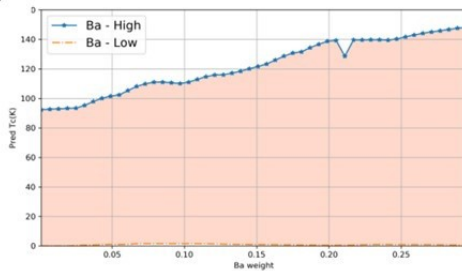

**d**

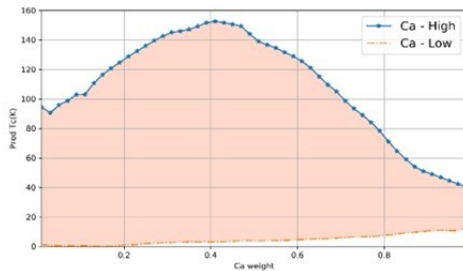

**e**

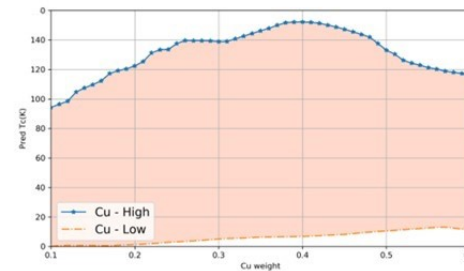

Supplement: d3ra02848h10.pdf [file d3ra02848h10.pdf]

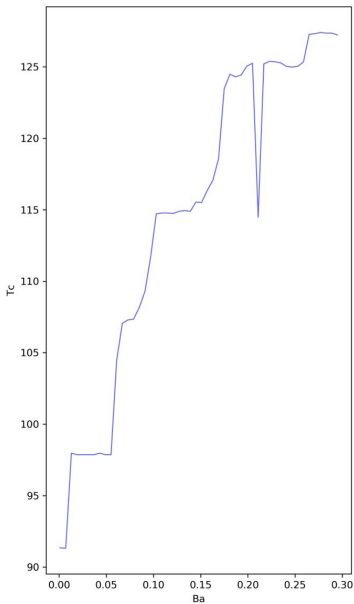

Supplement: d3ra02848h11.pdf [file d3ra02848h11.pdf]

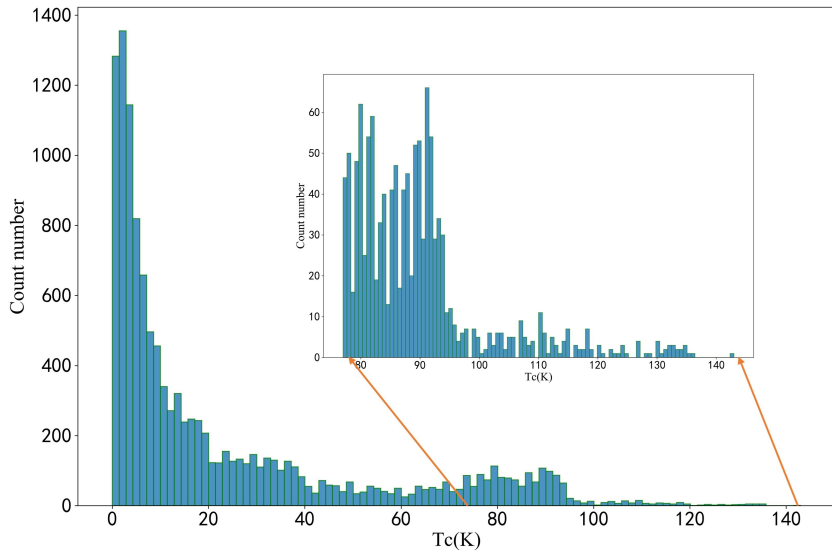

Supplement: d3ra02848h2.pdf [file d3ra02848h2.pdf]

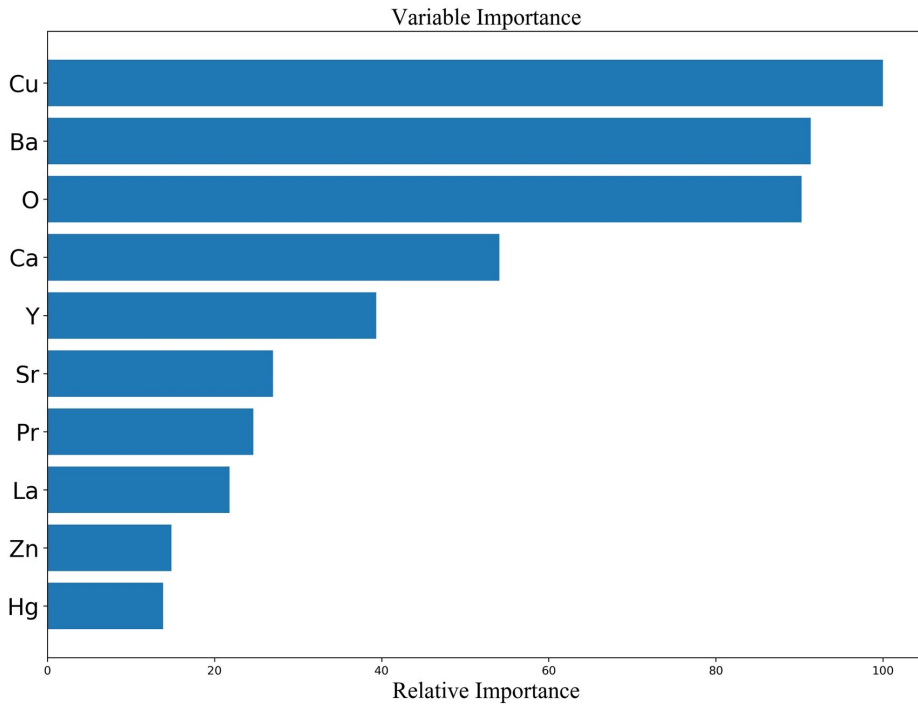

Supplement: d3ra02848h3.pdf [file d3ra02848h3.pdf]

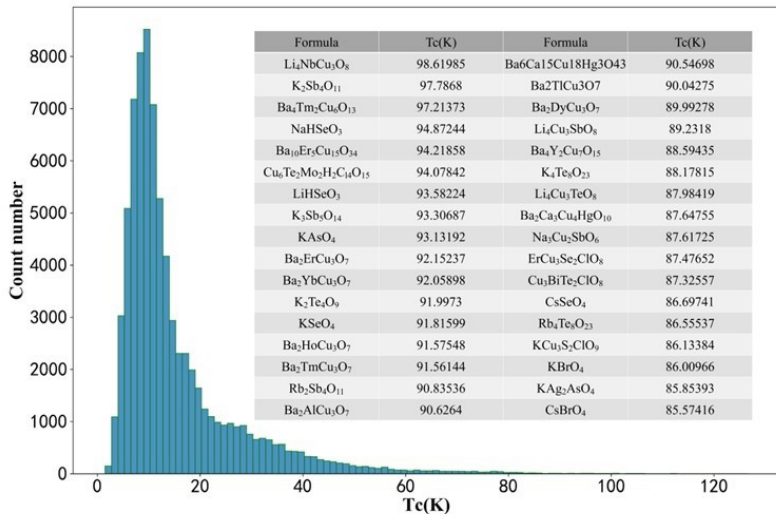

Supplement: d3ra02848h4.pdf [file d3ra02848h4.pdf]

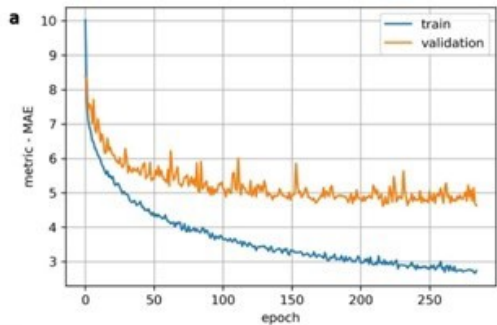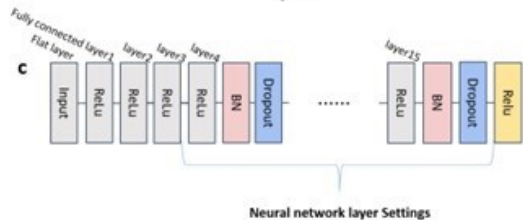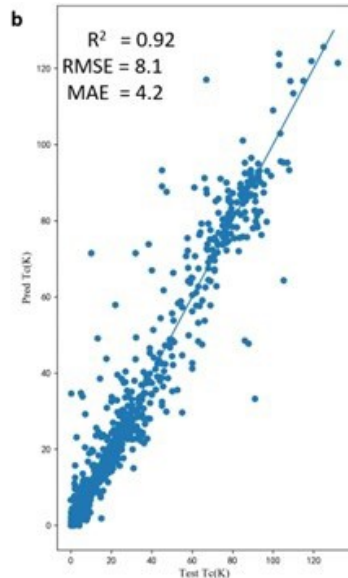

Supplement: d3ra02848h5.pdf [file d3ra02848h5.pdf]

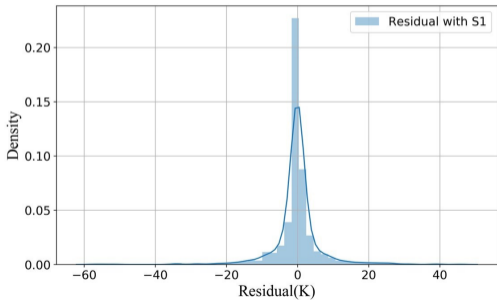

Supplement: d3ra02848h6.pdf [file d3ra02848h6.pdf]

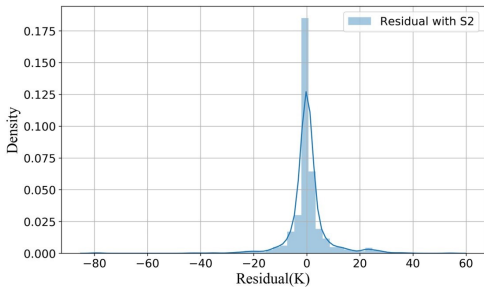

Supplement: d3ra02848h7.pdf [file d3ra02848h7.pdf]

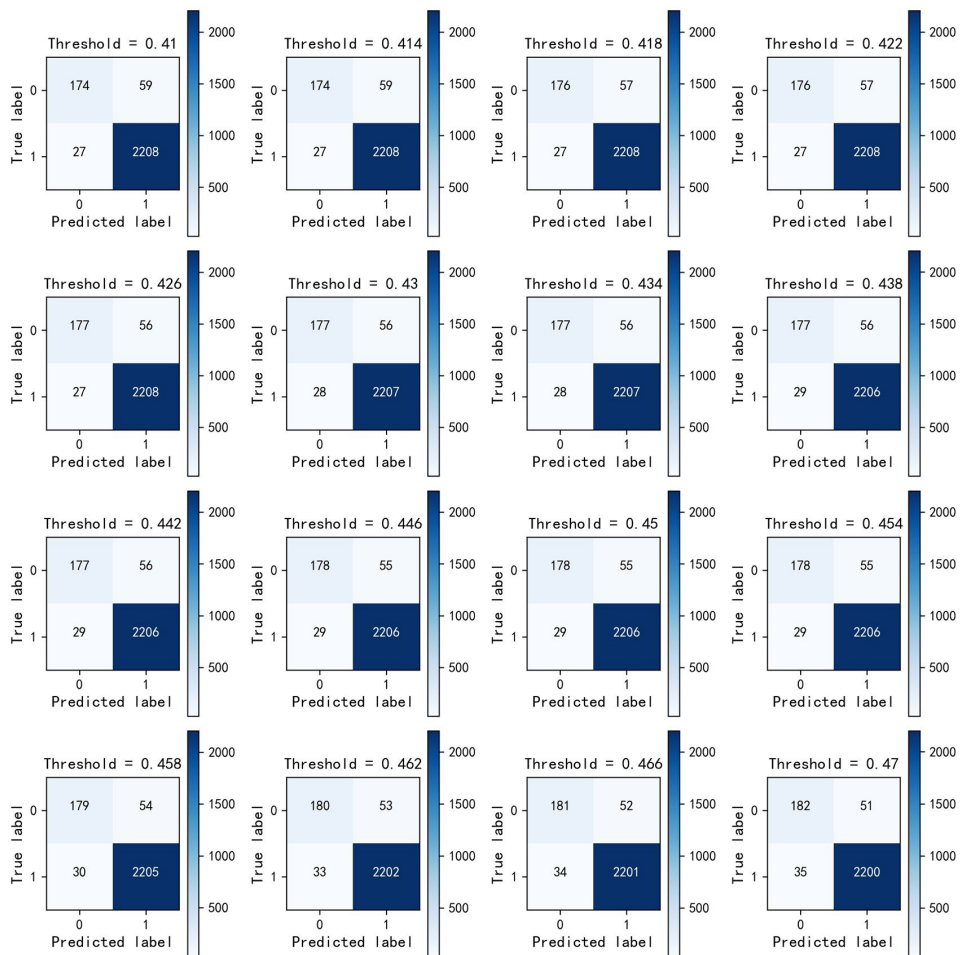

Supplement: d3ra02848h8.pdf [file d3ra02848h8.pdf]
